# Supplementary material for: Effectiveness and Safety of Different Treatment Modalities for Patients Older Than 60 Years with Distal Radius Fracture: A Network Meta-Analysis of Clinical Trials
Source: MDPI journal article supplement (doi:10.3390/ijerph20043697), 2023-02-19
Supplement: s1 [file s1]

**Table S4.** Characteristics of the randomized controlled trials included in this network meta-analyses.

| STUDY              |         | PATIENTS |                          |                   |                                   |                                                                                 | TREATMENT MODALITIES        |                                                                        |                               |                                                                                                                                               | OUTCOMES                                                                                                                                                                                                                                         |
|--------------------|---------|----------|--------------------------|-------------------|-----------------------------------|---------------------------------------------------------------------------------|-----------------------------|------------------------------------------------------------------------|-------------------------------|-----------------------------------------------------------------------------------------------------------------------------------------------|--------------------------------------------------------------------------------------------------------------------------------------------------------------------------------------------------------------------------------------------------|
| Author/<br>year    | Country | Patients | Age (y)<br>Mean $\pm$ SD | Female Number (%) | Dominant side involved Number (%) | Type of DRF                                                                     | Groups                      | Description of intervention                                            | Time of surgery Mean $\pm$ SD | Time of immobilization post treatment                                                                                                         | Outcomes / Follow-up                                                                                                                                                                                                                             |
| Arora et al 2011   | Austria | 36       | 75.9 $\pm$ NR            | 28 (77.8)         | 15 (41.7)                         | Unstable intra or extra-articular DRF (AO type: A2 3; A3 7; C1 4; C2 12; C3 10) | IG 1: VLP                   | Open reduction and internal fixation with VLP                          | NR                            | After surgery, the wrist was immobilized for 10 days, then the sutures were removed and the wrist was placed in a removable splint for 1 week | 6, 12 weeks, 6 months, and 1 year follow-up<br><br>Wrist ROM:<br>- Flexion<br>- Extension<br>- Pronation<br>- Supination<br>- Radial deviation<br>- Ulnar deviation<br><br>Grip strength<br><br>VAS<br><br>DASH<br><br>PRWE<br><br>Complications |
|                    |         | 37       | 77.4 $\pm$ NR            | 27 (73)           | 21 (56.8)                         | Unstable intra or extra-articular DRF (AO type: A2 3; A3 9; C1 11; C2 8; C3 6)  | CG: Non operative treatment | Closed reduction and cast immobilization                               |                               | 5 weeks                                                                                                                                       |                                                                                                                                                                                                                                                  |
| Atroshi et al 2006 | Sweden  | 19       | 71 $\pm$ NR              | 15 (78.9)         | 10 (52.6)                         | Unstable intra or extra-articular DRF (AO type: A2/A3 8; C2/C3 11)              | IG 1: BEF                   | The Hoffman external fixator was used. No additional fixation was used | 27 $\pm$ 11 min               | After surgery the wrist was immobilized for 6 weeks                                                                                           | 10 weeks, 6 months, and 1 year follow-up<br><br>Wrist ROM:<br>- Flexion<br>- Extension<br>- Pronation                                                                                                                                            |
|                    |         | 19       | 70 $\pm$ NR              | 16 (84.2)         | 9 (47.4)                          | Unstable intra or extra-articular DRF (AO type:                                 | IG 2: NBEF                  | The Hoffman Compact external fixation                                  | 37 $\pm$ 11 min               | After surgery the wrist was immobilized for 6 weeks                                                                                           |                                                                                                                                                                                                                                                  |

|                             |              |    |                   |                  |              |                                                                                                |                                              |                                                                                                                              |    |                                                                                                          |                                                                                                                                                                                                                                                            |
|-----------------------------|--------------|----|-------------------|------------------|--------------|------------------------------------------------------------------------------------------------|----------------------------------------------|------------------------------------------------------------------------------------------------------------------------------|----|----------------------------------------------------------------------------------------------------------|------------------------------------------------------------------------------------------------------------------------------------------------------------------------------------------------------------------------------------------------------------|
|                             |              |    |                   |                  |              | A2/A3<br>11;<br>C2/C3<br>8)                                                                    |                                              | was<br>used. No<br>additional<br>fixation<br>was used                                                                        |    |                                                                                                          | -<br>Supinati<br>on<br>-Radial<br>deviation<br>-Ulnar<br>deviation<br><br>Grip<br>strength<br><br>VAS<br><br>DASH<br><br>SF-12<br><br>Complic<br>ations                                                                                                    |
| Azzop<br>ardi et al<br>2005 | Scotlan<br>d | 27 | 72<br>± 8         | 23<br>(85.2<br>) | 10<br>(37)   | Unstabl<br>e,<br>dorsally<br>angulat<br>ed and<br>extraarti<br>cular<br>DRF<br>(A3 type<br>AO) | IG 1:<br>PKW                                 | Closed<br>reduction<br>,<br>supplem<br>entary<br>percutan<br>eous<br>pinning<br>(k-wires),<br>and cast<br>immobiliz<br>ation | NR | After<br>surgery<br>the wrist<br>was<br>immobiliz<br>ed for 5<br>weeks,<br>then wires<br>were<br>removed | 1-year<br>follow-up<br><br>Wrist<br>ROM:<br>-Flexion<br>-<br>Extensio<br>n<br>-<br>Pronatio<br>n<br>-<br>Supinati<br>on<br>-Radial<br>deviation<br>-Ulnar<br>deviation<br><br>Grip<br>strength<br><br>ADL<br><br>VAS<br><br>SF-36<br><br>Complic<br>ations |
|                             |              | 27 | 71<br>± 9         | 25<br>(92.6<br>) | 12<br>(44.4) | Unstabl<br>e,<br>dorsally<br>angulat<br>ed and<br>extraarti<br>cular<br>DRF<br>(A3 type<br>AO) | CG:<br>Non<br>opera<br>tive<br>treat<br>ment | Closed<br>reduction<br>and cast<br>immobiliz<br>ation                                                                        |    | 5 weeks                                                                                                  | Supinati<br>on<br>-Radial<br>deviation<br>-Ulnar<br>deviation<br><br>Grip<br>strength<br><br>ADL<br><br>VAS<br><br>SF-36<br><br>Complic<br>ations                                                                                                          |
| Bartl et<br>al 2014         | Germa<br>ny  | 86 | 75.<br>3 ±<br>6.7 | 77<br>(90)       | 76<br>(89)   | Unstabl<br>e<br>intraarti<br>cular<br>DRF<br>(AO<br>type: C1<br>36; C2<br>35; C3<br>15)        | IG 1:<br>VLP                                 | Open<br>reduction<br>and<br>internal<br>fixation<br>with VLP                                                                 | NR | 2 weeks                                                                                                  | 3<br>months,<br>and 1<br>year<br>follow-up<br><br>Wrist<br>ROM:<br>-Flexion<br>-<br>Extensio<br>n<br>-<br>Pronatio<br>n<br>-<br>Supinati<br>on                                                                                                             |
|                             |              | 88 | 74.<br>4 ±<br>7.1 | 76<br>(86)       | 84<br>(97)   | Unstabl<br>e<br>intraarti<br>cular<br>DRF<br>(AO<br>type: C1                                   | CG:<br>Non<br>opera<br>tive<br>treat<br>ment | Closed<br>reduction<br>and cast<br>immobiliz<br>ation                                                                        |    | 6 weeks                                                                                                  | Supinati<br>on                                                                                                                                                                                                                                             |

[illegible]

|                     |         |    |            |           |           |                                                                                |                             |                                                                                                                                  |             |         |                                                                                                                                              |
|---------------------|---------|----|------------|-----------|-----------|--------------------------------------------------------------------------------|-----------------------------|----------------------------------------------------------------------------------------------------------------------------------|-------------|---------|----------------------------------------------------------------------------------------------------------------------------------------------|
|                     |         |    |            |           |           | 25; C3 2)                                                                      |                             |                                                                                                                                  |             |         |                                                                                                                                              |
| Foldhazy et al 2010 | Sweden  | 28 | 73.5 ± NR  | 24 (85.7) | 17 (60.7) | Unstable intra or extra-articular DRF (AO type: A2 1; A3 10; C2 7; C3 4)       | IG 1: BEF                   | Closed reduction, BEF without supplemental k-wires, and immobilization                                                           | NR          | 5 weeks | 2, 6 months, and 1 year follow-up.<br>GOBC<br>VAS                                                                                            |
|                     |         | 31 | 71.5 ± NR  | 29 (93.6) | 12 (38.7) | Unstable intra or extra-articular DRF (AO type: A2 5; A3 11; C1 1; C2 8; C3 4) | GC: Non operative treatment | Closed reduction and cast immobilization                                                                                         |             | 5 weeks | Grip strength<br>Wrist ROM:<br>-Flexion<br>-Extension<br>-Pronation<br>-Supination<br>-Radial deviation<br>-Ulnar deviation<br>Complications |
| Goehre et al 2014   | Germany | 21 | 71.3 ± 5.7 | 18 (85.7) | NR        | Unstable intra or extra-articular DRF (AO type: A2 4; A3 14; C1 3)             | IG 1: VLP                   | Open reduction and internal fixation with VLP                                                                                    | 60 min ± NR | 1 week  | 3, 6 months, and 1 year follow-up.<br>DASH<br>PRWE                                                                                           |
|                     |         | 19 | 73.8 ± 8.9 | 19 (100)  | NR        | Unstable intra or extra-articular DRF (AO type: A2 9; A3 6; C1 4)              | IG 2: PKW                   | Closed reduction, supplementary percutaneous k-wires fixation (combined Kapandji and Willenegger techniques), and immobilization | 23 min ± NR | 6 weeks | Castain Score<br>Grip strength<br>Wrist ROM:<br>-Flexion<br>-Extension<br>-Pronation<br>-Supination<br>-Radial deviation<br>-Ulnar deviation |

|                        |             |    |           |           |         |                                                                                  |                             |                                                                            |             |           |                                                                                                                                                                                             |
|------------------------|-------------|----|-----------|-----------|---------|----------------------------------------------------------------------------------|-----------------------------|----------------------------------------------------------------------------|-------------|-----------|---------------------------------------------------------------------------------------------------------------------------------------------------------------------------------------------|
|                        |             |    |           |           |         |                                                                                  |                             |                                                                            |             |           | Complications                                                                                                                                                                               |
| Hassell und et al 2021 | Norwegian   | 50 | 73.4 ± NR | 47 (94)   | 24 (48) | Unstable intra or extra-articular DRF (AO type: A2 3; A3 9; C1 13; C2 16; C3 9)  | IG 1: VLP                   | Open reduction and internal fixation with VLP                              | NR          | 2 weeks   | 3, 6 months, and 1 year follow-up<br><br>Quick DASH<br><br>PRWE                                                                                                                             |
|                        |             | 50 | 73.9 ± NR | 42 (84)   | 18 (36) | Unstable intra or extra-articular DRF (AO type: A2 2; A3 12; C1 11; C2 18; C3 7) | CG: Non operative treatment | Closed reduction and cast immobilization                                   |             | 5.5 weeks | EQ-5D index<br><br>EQ-VAS<br><br>Grip strength<br><br>Wrist ROM:<br>- Flexion<br>- Extension<br>- Pronation<br>- Supination<br>- Radial deviation<br>- Ulnar deviation<br><br>Complications |
| Hegeman et al 2004     | Netherlands | 15 | 71 ± 7.9  | 13 (86.7) | NR      | Unstable intra-articular DRF (AO type: C2 9; C3 6)                               | IG 1: BEF                   | Closed reduction, Hoffman II Compact external fixation, and immobilization | NR          | 6 weeks   | 6 weeks, 3 months, and 1 year follow-up<br><br>Gartland and Werley Score                                                                                                                    |
|                        |             | 17 | 69 ± 8    | 16 (94.1) | NR      | Unstable intra-articular DRF (AO type: C2 14; C3 3)                              | CG: Non operative treatment | Closed reduction and cast immobilization                                   |             | 6 weeks   | Grip strength<br><br>Wrist ROM:<br>- Flexion<br>- Extension<br><br>Complications                                                                                                            |
|                        |             | 20 | 66 ± NR   | 25 (100)  | 6 (24)  | Dorsally displaced intra                                                         | IG 1: PKW                   | Closed reduction                                                           | 32 ± 14 min | 5 weeks   | 3 months, and 1                                                                                                                                                                             |

|                                                   |             |    |            |           |           |                                                                                              |                             |                                                                        |             |         |                                                                                                                                                           |
|---------------------------------------------------|-------------|----|------------|-----------|-----------|----------------------------------------------------------------------------------------------|-----------------------------|------------------------------------------------------------------------|-------------|---------|-----------------------------------------------------------------------------------------------------------------------------------------------------------|
| <b>Hollevoet et al 2011</b>                       | Belgium     |    |            |           |           | or extra-articular DRF (intra articular 13)                                                  |                             | supplementary percutaneous pinning (k-wires), and cast immobilization  |             |         | year follow-up                                                                                                                                            |
|                                                   |             | 20 | 67 ± NR    | 16 (80)   | 9 (45)    | Dorsally displaced intra or extra-articular DRF (intra articular 9)                          | IG 2: VLP                   | Open reduction and internal fixation with VLP                          | 65 ± 20 min | 5 weeks | Wrist ROM:<br>-Flexion-extension arc<br>-Pronation – supination arc<br>Grip strength<br>DASH<br>Complications                                             |
| <b>Horne et al 1990</b>                           | New Zealand | 14 | 70.6 ± 5.4 | NR        | NR        | Displaced intra or extra-articular DRF (Frykman type: extra articular 10; intra articular 5) | IG 1: BEF                   | Closed reduction, BEF without supplemental k-wires, and immobilization | NR          | 5 weeks | 4 to 15 months follow-up<br>Functional assessment score                                                                                                   |
|                                                   |             | 15 | 73.9 ± 8.6 | NR        | NR        | Displaced intra or extra-articular DRF (Frykman type: extra articular 6; intra articular 8)  | CG: Non operative treatment | Closed reduction and cast immobilization                               |             | 5 weeks |                                                                                                                                                           |
| <b>Jakubietz et al 2008; Jakubietz et al 2012</b> | Switzerland | 15 | 64.5 ± NR  | 13 (86.7) | 15 (100)  | Unstable intra-articular DRF (AO type: C1 10; C2 4; C3 1)                                    | IG 1: VLP                   | Open reduction and internal fixation with VLP                          | NR          | 2 weeks | 6 weeks, 3, 6 months, and 1 year follow-up<br>Wrist ROM:<br>-Flexion-extension arc<br>-Pronation – supination arc<br>-Radial – Ulnar arc<br>Grip strength |
|                                                   |             | 15 | 66.3 ± NR  | 12 (80)   | 10 (66.7) | Unstable intra-articular DRF (AO type: C1 10; C2 3; C3 2)                                    | IG 2: DPF                   | Open reduction and internal fixation with DPF                          | NR          | 2 weeks |                                                                                                                                                           |

|                        |                           |    |            |           |           |                                                                           |                   |                                                                                               |    |         | VAS<br>Gartland<br>Werley<br>Score<br>Complic<br>ations                                                                            |
|------------------------|---------------------------|----|------------|-----------|-----------|---------------------------------------------------------------------------|-------------------|-----------------------------------------------------------------------------------------------|----|---------|------------------------------------------------------------------------------------------------------------------------------------|
| Jeudy<br>et al<br>2012 | France                    | 39 | 64.6 ± 3.5 | 31 (79.5) | 17 (43.6) | Unstable intra-articular DRF (AO type: C2 34; C3 5)                       | IG 1: BEF         | Closed reduction, Hoffman II external fixation, with supplemental k-wires, and immobilization | NR | 6 weeks | 6 weeks, 3- and 6-months follow-up<br>Wrist ROM: -Flexion-extension arc<br>Grip strength                                           |
|                        |                           | 46 | 64.7 ± 3.7 | 26 (56.5) | 18 (38.9) | Unstable intra-articular DRF (AO type: C2 26; C3 10)                      | IG 2: VLP         | Open reduction and internal fixation with VLP                                                 | NR | 6 weeks | GOBC<br>PRWE<br>Complic<br>ations                                                                                                  |
| Koshimine et al 2005   | Japan                     | 22 | 68 ± NR    | 18 (81.8) | NR        | Unstable intra or extra-articular DRF (AO type: A2 8; A3 1; C1 7; C2 6)   | IG 1: VLP         | Open reduction and internal fixation with VLP                                                 | NR | 2 weeks | 6 to 24 months follow-up<br>Wrist ROM: -Flexion - Extension - Pronation - Supination<br>Gartland Werley Score<br>Complic<br>ations |
|                        |                           | 31 | 74 ± NR    | 28 (90.3) | NR        | Unstable intra or extra-articular DRF (AO type: A2 10; A3 2; C1 5; C2 14) | IG 2: VNLP        | Open reduction and internal fixation with VNLP                                                | NR | 2 weeks |                                                                                                                                    |
| Lawson et al 2021      | Australia and New Zealand | 81 | 70.5 ± 7   | 70 (86.4) | NR        | Unstable intra or extra-articular DRF (AO type: A 55; C 26)               | IG 1: VLP         | Open reduction and internal fixation with VLP                                                 | NR | 2 weeks | 3 months, and 1 year follow-up<br>PRWE<br>DASH                                                                                     |
|                        |                           | 85 | 71.3 ± 7.6 | 75 (88.2) | NR        | Unstable intra or extra-articular DRF                                     | CG: Non operative | Closed reduction and cast immobilization                                                      |    | 6 weeks | EQ-5D index<br>EQ-VAS                                                                                                              |

|                                   |        |    |         |           |           | (AO type: A 49; C 35)                                                     | treatment                   |                                                                                         |    |         | NRS<br>Complications                                                                                                                                                               |
|-----------------------------------|--------|----|---------|-----------|-----------|---------------------------------------------------------------------------|-----------------------------|-----------------------------------------------------------------------------------------|----|---------|------------------------------------------------------------------------------------------------------------------------------------------------------------------------------------|
| <b>Marcheix et al 2010</b>        | France | 53 | 73 ± 11 | 48 (90.6) | 32 (60.4) | Unstable intra or extra-articular DRF (AO type: A2 1; A3 22; C2 23; C3 6) | IG 1: PKW                   | Closed reduction, supplementary percutaneous pinning (k-wires), and cast immobilization | NR | 6 weeks | 3- and 6-months follow-up<br><br>Wrist ROM:<br>- Flexion<br>- Extension<br>- Pronation<br>- Supination<br><br>DASH<br><br>Grip strength<br><br>Herzberg Score<br><br>Complications |
|                                   |        | 50 | 75 ± 11 | 38 (76)   | 22 (44)   | Unstable intra or extra-articular DRF (AO type: A3 17; C2 25; C3 8)       | IG 2: VLP                   | Open reduction and internal fixation with VLP                                           | NR | 3 weeks |                                                                                                                                                                                    |
| <b>Martinez-Méndez et al 2017</b> | Spain  | 50 | 67 ± 8  | 39 (78)   | 35 (70)   | Unstable intra-articular DRF (AO type: C1 23; C2 23; C3 4)                | IG 1: VLP                   | Open reduction and internal fixation with VLP                                           | NR | 1 week  | 2 years follow-up<br><br>Wrist ROM:<br>- Flexion<br>- Extension<br>- Pronation<br>- Supination<br><br>Grip strength<br><br>VAS<br><br>DASH<br><br>PRWE<br><br>Complications        |
|                                   |        | 47 | 70 ± 7  | 37 (78.7) | 30 (63.8) | Unstable intra-articular DRF (AO type: C1 22; C2 20; C3 5)                | CG: Non operative treatment | Closed reduction and cast immobilization                                                | NR | 6 weeks |                                                                                                                                                                                    |
|                                   |        | 70 | 63 ± NR | 63 (90)   | 34 (48.6) | Unstable intra or extra-articular DRF (AO type: A2 5; A3 25; C1           | IG 1: VLP                   | Open reduction and internal fixation with VLP                                           | NR | 4 weeks | 6 weeks, 3 months, 1- and 3-years follow-up<br><br>Wrist ROM:                                                                                                                      |

|                                                    |        |    |         |            |           |                                                                                 |                             |                                                                                                       |    |           |                                                                                        |                                                                                                                                                                                |
|----------------------------------------------------|--------|----|---------|------------|-----------|---------------------------------------------------------------------------------|-----------------------------|-------------------------------------------------------------------------------------------------------|----|-----------|----------------------------------------------------------------------------------------|--------------------------------------------------------------------------------------------------------------------------------------------------------------------------------|
| Mellstr and-Navarro et al 2016; Saving et al 2019a | Sweden |    |         |            |           | 35; C2 3; C3 2)                                                                 |                             |                                                                                                       |    |           |                                                                                        | -Flexion<br>- Extension<br>- Pronation<br>- Supination<br>-Radial deviation<br>-Ulnar deviation<br><br>DASH<br><br>Grip strength<br><br>PRWE<br><br>EQ-5D<br><br>Complications |
|                                                    |        | 69 | 63 ± NR | 64 (92.8 ) | 28 (40.6) | Unstable intra or extra-articular DRF (AO type: A2 5; A3 20; C1 38; C2 4; C3 2) | IG 2: BEF                   | Closed reduction , Hoffman Compact external fixation with supplemental k-wires, and immobilization    | NR | 5.5 weeks |                                                                                        |                                                                                                                                                                                |
| Moroni et al 2004                                  | Italy  | 20 | >6 5    | NR         | NR        | Unstable extra-articular DRF (AO type: A2/A3)                                   | IG 1: BEF                   | Closed reduction , Orthofix Pennig II external fixation with supplemental k-wires, and immobilization | NR | 6 weeks   | 3 months follow-up<br><br>Horesh Demerit Point Wrist<br><br>SF-36<br><br>Complications |                                                                                                                                                                                |
|                                                    |        | 20 | >6 5    | NR         | NR        | Unstable extra-articular DRF (AO type: A2/A3)                                   | CG: Non operative treatment | Closed reduction and cast immobilization                                                              | NR | 6 weeks   |                                                                                        |                                                                                                                                                                                |
| Saving et al 2019                                  | Sweden | 58 | 80 ± NR | 55 (94.8 ) | 27 (46.6) | Unstable intra or extra-articular DRF (AO type: A2 5; A3 25; C1 35; C2 3; C3 2) | IG 1: VLP                   | Open reduction and internal fixation with VLP                                                         | NR | 2 weeks   | 3 months, and 1 year follow-up<br><br>PRWE<br><br>DASH<br><br>EQ-5D                    |                                                                                                                                                                                |
|                                                    |        | 64 | 78 ± NR | 56 (87.5 ) | 23 (35.9) | Unstable intra or extra-articular DRF (AO type: A2 5; A3 25; C1 35; C2 3; C3 2) | CG: Non operative treatment | Closed reduction and cast immobilization                                                              |    | 4.5 weeks | Wrist ROM:<br>-Flexion<br>- Extension<br>- Pronation                                   |                                                                                                                                                                                |

|                  |          |    |         |           |           |                                                                                  |                             |                                                                                         |    |           |                                                                                                                                |
|------------------|----------|----|---------|-----------|-----------|----------------------------------------------------------------------------------|-----------------------------|-----------------------------------------------------------------------------------------|----|-----------|--------------------------------------------------------------------------------------------------------------------------------|
|                  |          |    |         |           |           |                                                                                  |                             |                                                                                         |    |           | - Supination<br>-Radial deviation<br>-Ulnar deviation<br><br>Grip strength                                                     |
| Tahir et al 2021 | Pakistan | 87 | 81 ± 3  | 16 (18.4) | 60 (69)   | Unstable intra or extra-articular DRF (AO type: A2 31; A3 28; C1 9; C2 9; C3 10) | IG 1: VLP                   | Open reduction and internal fixation with VLP                                           | NR | NR        | 3 months, and 1 year follow-up<br><br>PRWE<br><br>Quick DASH                                                                   |
|                  |          | 72 | 81 ± 2  | 17 (23.6) | 45 (62.5) | Unstable intra or extra-articular DRF (AO type: A2 38; A3 3; C1 18; C2 9; C3 4)  | CG: Non operative treatment | Closed reduction and cast immobilization                                                |    | 4.5 weeks | Mayo Wrist Score<br><br>SF-12<br><br>Wrist ROM:<br>-Flexion<br>- Extension<br>- Pronation<br>- Supination<br><br>Grip strength |
| Wong et al 2010  | China    | 30 | 70 ± NR | 24 (80)   | 21 (70)   | Unstable extra-articular DRF (Frykman type: I 17; II 13)                         | IG 1: PKW                   | Closed reduction, supplementary percutaneous pinning (k-wires), and cast immobilization | NR | 6 weeks   | 1 year follow-up<br><br>Wrist range of motion:<br>-Flexion<br>- Extension<br>- Pronation                                       |
|                  |          | 30 | 71 ± NR | 25 (83.3) | 20 (66.7) | Unstable extra-articular DRF (Frykman type: I 18; II 12)                         | CG: Non operative treatment | Closed reduction and cast immobilization                                                |    | 6 weeks   | - Supination<br>-Radial deviation<br>-Ulnar deviation<br><br>Grip Strength                                                     |

|  |  |  |  |  |  |  |  |  |  |  |                        |
|--|--|--|--|--|--|--|--|--|--|--|------------------------|
|  |  |  |  |  |  |  |  |  |  |  | Mayo<br>Wrist<br>Score |
|  |  |  |  |  |  |  |  |  |  |  | WHOQo<br>L             |
|  |  |  |  |  |  |  |  |  |  |  | Complic<br>ations      |

**ADL:** Activities of Daily Living; **BEF:** Bridging External Fixation; **CG:** Control Group; **DASH:** Disabilities of the Arm, Shoulder and Hand questionnaire; **DPF:** Dorsal Plate Fixation; **DRF:** Distal Radius Fracture; **EQ-5D** index: EuroQol 5D questionnaire; **EQ-VAS:** EuroQol Visual Analog Scale; **GOBC:** Green & O'Brian/Coney questionnaire; **IG:** Intervention Group; **IMN:** Intramedullary Nail; **MHQ:** Michigan Hand Questionnaire; **NBEF:** Non Bridging External Fixation; **NR:** Not Reported; **NRS:** Numerical Rating Scale; **PKW:** Percutaneous K-wire; **PRWE:** Patient Rated-Wrist Evaluation questionnaire; **ROM:** Range of Motion; **SD:** Standard Deviation; **SF-12:** 12-Item Short Form Survey of Health; **SF-36:** 36-Item Short Form Survey of Health; **VAS:** Visual Analog Scale; **VLP:** Volar Locking Plate; **VNLP:** Volar Non-Locking Plate; **WHOQoL:** World Health Organization Quality of Life questionnaire.
