# Supplementary material for: Effectiveness and Safety of Different Treatment Modalities for Patients Older Than 60 Years with Distal Radius Fracture: A Network Meta-Analysis of Clinical Trials
Source: MDPI journal article supplement (doi:10.3390/ijerph20043697), 2023-02-19
Supplement: s1 [file s1]

**Table S6.** Subgroup analyses of different treatment modalities on clinical complications, by time of follow-up.

| Comparisons | Follow-up (months) | Number studies | Overall Complications RR (95% CI) | I <sup>2</sup> (%) | p-value | Number studies | Minor Complications RR (95% CI) | I <sup>2</sup> (%) | p-value | Number studies | Mayor complications RR (95% CI) | I <sup>2</sup> (%) | p-value |
|-------------|--------------------|----------------|-----------------------------------|--------------------|---------|----------------|---------------------------------|--------------------|---------|----------------|---------------------------------|--------------------|---------|
| VLP / CI    | 12                 | 7              | 0.79 (0.38, 1.66)                 | 84.6               | 0.538   | 7              | 0.57 (0.24, 1.38)               | 79.9               | 0.214   | 8              | 1.35 (0.78, 2.32)               | 1.9                | 0.287   |
| VLP / CI    | 24                 | 1              | <b>0.69 (0.34, 1.39)</b>          | NA                 | 0.012   | 1              | <b>0.07 (0.01, 0.55)</b>        | NA                 | 0.011   | NA             | NA                              | NA                 | NA      |
| VLP / PKW   | 6                  | 1              | <b>0.12 (0.02, 0.88)</b>          | NA                 | 0.037   | 1              | <b>0.12 (0.02, 0.88)</b>        | NA                 | 0.037   | NA             | NA                              | NA                 | NA      |
| VLP / PKW   | 12                 | 2              | 0.61 (0.31, 1.21)                 | 24.3               | 0.158   | 2              | <b>0.37 (0.15, 0.95)</b>        | 0                  | 0.039   | 2              | 18.38 (3.07, 110.04)            | 0                  | 0.001   |
| VLP / BEF   | 6                  | 1              | <b>0.5 (0.29, 0.86)</b>           | NA                 | 0.025   | 1              | <b>0.5 (0.29, 0.86)</b>         | NA                 | 0.018   | NA             | NA                              | NA                 | NA      |
| VLP / BEF   | 12                 | 1              | 1.22 (0.91, 1.63)                 | NA                 | 0.261   | 1              | 1.01 (0.67, 1.53)               | NA                 | 0.353   | NA             | NA                              | NA                 | NA      |
| PKW / CI    | 12                 | 2              | 1 (0.15, 6.85)                    | 0                  | 1.000   | 2              | 0.52 (0.04, 6.02)               | 0                  | 0.597   | 2              | 6.36 (0.81, 49.99)              | 0                  | 0.079   |

|                 |    |   |                          |    |       |   |                   |    |       |    |    |    |    |
|-----------------|----|---|--------------------------|----|-------|---|-------------------|----|-------|----|----|----|----|
| <b>BEF / CI</b> | 3  | 1 | 0.11 (0.01, 1.99)        | NA | 0.136 | 1 | 0.11 (0.01, 1.99) | NA | 0.136 | NA | NA | NA | NA |
| <b>BEF / CI</b> | 12 | 3 | <b>3.42 (1.69, 6.95)</b> | 0  | 0.001 | 4 | 3.42 (1.69, 6.95) | 0  | 0.001 | NA | NA | NA | NA |

CI: Confidence interval; RR: Risk ratio; NA: Not available. MD **in bold**: statistically significant.
