# Supplementary material for: Effectiveness and Safety of Different Treatment Modalities for Patients Older Than 60 Years with Distal Radius Fracture: A Network Meta-Analysis of Clinical Trials
Source: MDPI journal article supplement (doi:10.3390/ijerph20043697), 2023-02-19
Supplement: s1 [file s1]

**Table S8.** Subgroup analyses of different treatment modalities on clinical complications, by type of DRF.

| Comparisons | Type of DRF | Number studies | Overall Complications RR (95% CI) | I <sup>2</sup> (%) | p-value | Number studies | Minor Complications RR (95% CI) | I <sup>2</sup> (%) | p-value | Number studies | Mayor complications RR (95% CI) | I <sup>2</sup> (%) | p-value |
|-------------|-------------|----------------|-----------------------------------|--------------------|---------|----------------|---------------------------------|--------------------|---------|----------------|---------------------------------|--------------------|---------|
| VLP / CI    | IA          | 2              | <b>0.17 (0.09, 0.32)</b>          | 0                  | 0.000   | 2              | <b>0.07 (0.03, 0.18)</b>        | 0                  | 0.000   | 2              | 2.58 (0.6, 11.12)               | 0                  | 0.204   |
| VLP / CI    | EA/IA       | 6              | 1.05 (0.56, 1.96)                 | 74.2               | 0.887   | 6              | 0.84 (0.42, 1.69)               | 63                 | 0.627   | 6              | 1.25 (0.64, 2.43)               | 1.9                | 0.516   |
| VLP / PKW   | EA/IA       | 3              | 0.49 (0.21, 1.14)                 | 24.3               | 0.098   | 3              | <b>0.3 (0.13, 0.71)</b>         | 0                  | 0.006   | 2              | <b>18.38 (3.07, 110.04)</b>     | 0                  | 0.001   |
| VLP / BEF   | IA          | 1              | <b>0.5 (0.29, 0.86)</b>           | NA                 | 0.025   | 1              | <b>0.5 (0.29, 0.86)</b>         | NA                 | 0.018   | NA             | NA                              | NA                 | NA      |
|             | EA/IA       | 1              | 1.22 (0.91, 1.63)                 | NA                 | 0.261   | 1              | 1.01 (0.67, 1.53)               | NA                 | 0.353   | NA             | NA                              | NA                 | NA      |
| PKW / CI    | EA          | 2              | 1 (0.15, 6.85)                    | 0                  | 1.000   | 2              | 0.52 (0.04, 6.02)               | 0                  | 0.597   | 2              | 6.36 (0.81, 49.99)              | 0                  | 0.079   |
| BEF / CI    | EA          | 1              | 0.11 (0.01, 1.99)                 | NA                 | 0.136   | 1              | 0.11 (0.01, 1.99)               | NA                 | 0.136   | NA             | NA                              | NA                 | NA      |
| BEF / CI    | IA          | 1              | <b>3.12 (1.26, 7.74)</b>          | NA                 | 0.014   | 1              | <b>3.12 (1.26, 7.74)</b>        | NA                 | 0.014   | NA             | NA                              | NA                 | NA      |
| BEF / CI    | EA/IA       | 2              | <b>3.95 (1.28, 12.2)</b>          | 0                  | 0.017   | 2              | <b>3.95 (1.28, 12.2)</b>        | 0                  | 0.017   | NA             | NA                              | NA                 | NA      |

EA: Extra-articular; IA: Intra-articular; CI: Confidence interval; RR: Risk ratio. MD in **bold**: statistically significant.
