# Supplementary material for: Effectiveness and Safety of Different Treatment Modalities for Patients Older Than 60 Years with Distal Radius Fracture: A Network Meta-Analysis of Clinical Trials
Source: MDPI journal article supplement (doi:10.3390/ijerph20043697), 2023-02-19
Supplement: s1 [file s1]

**Figure S1.** Contribution plot for the DASH questionnaire.

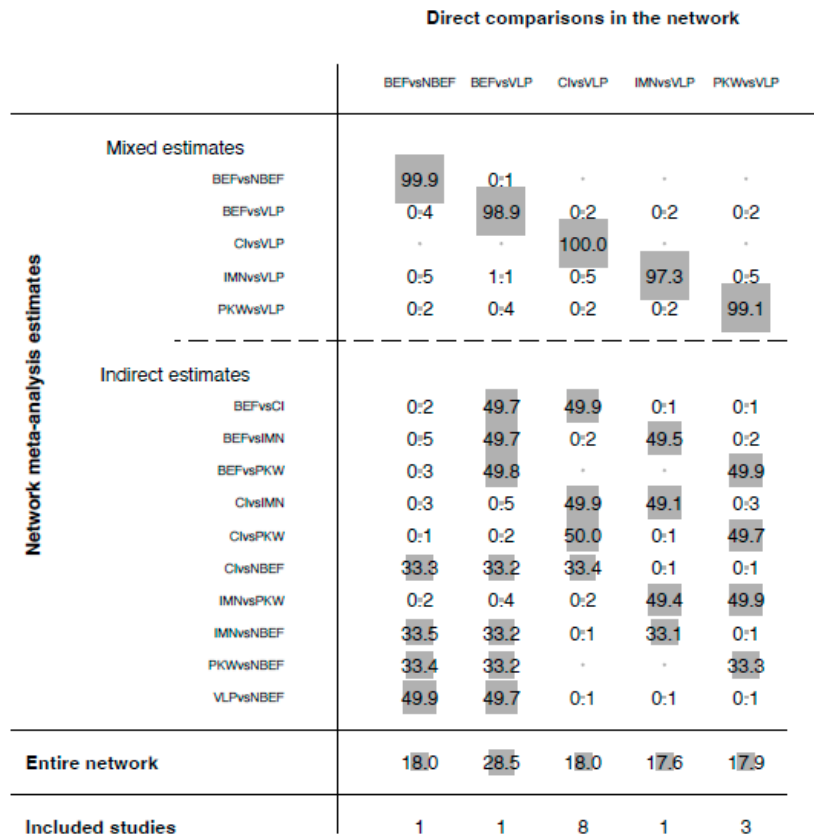

The size of each square is proportional to the weight attached to each direct summary effect (horizontal axis) for the estimation of each network summary effects (vertical axis). The numbers re-express the weight as percentages.

**BEF:** Bridging external fixation; **CI:** Cast immobilization; **IM:** Intramedullary nail; **NBEF:** Nonbridging external fixation; **PKW:** Percutaneous kirshner wire; **VLP:** Volar locking plate.

**Figure S2.** Contribution plot for the PRWE questionnaire.

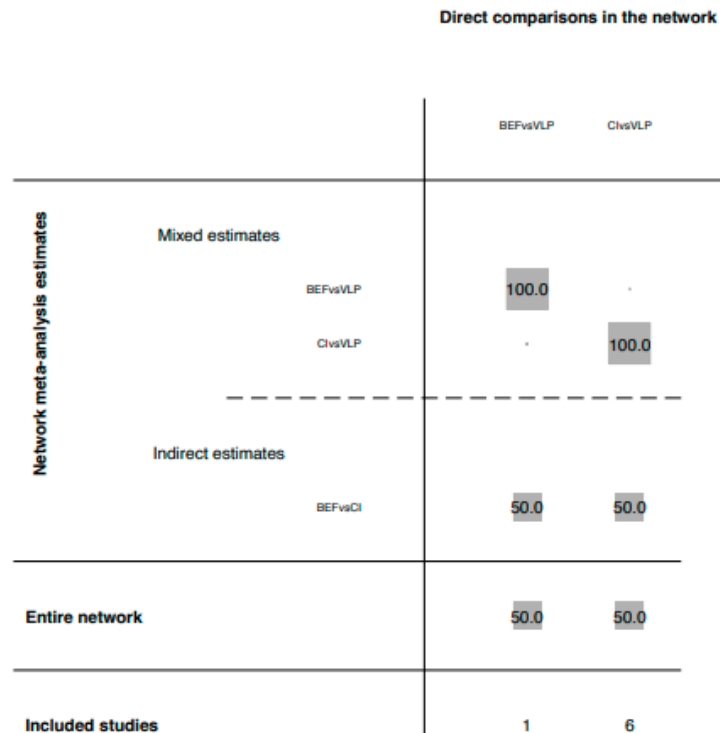

The size of each square is proportional to the weight attached to each direct summary effect (horizontal axis) for the estimation of each network summary effects (vertical axis). The numbers re-express the weight as percentages.

**BEF:** Bridging external fixation; **CI:** Cast immobilization; **VLP:** Volar locking plate.

**Figure S3.** Contribution plot for the Grip strength.

|                                 |                    | Direct comparisons in the network |          |          |         |         |          |          |
|---------------------------------|--------------------|-----------------------------------|----------|----------|---------|---------|----------|----------|
|                                 |                    | BEFvsCI                           | BEFvsPKW | BEFvsVLP | CIvsPKW | CIvsVLP | DPFvsVLP | PKWvsVLP |
| Network meta-analysis estimates | Mixed estimates    |                                   |          |          |         |         |          |          |
|                                 | BEFvsCI            | 21.3                              | 13.4     | 22.9     | 19.6    | 16.6    | *        | 6.2      |
|                                 | BEFvsPKW           | 18.0                              | 11.3     | 19.3     | 32.0    | 14.0    | *        | 5.3      |
|                                 | BEFvsVLP           | 13.8                              | 8.6      | 52.7     | 2.5     | 16.3    | 0.1      | 6.1      |
|                                 | CIvsPKW            | *                                 | *        | *        | 99.9    | *       | *        | *        |
|                                 | CIvsVLP            | 11.6                              | 7.3      | 18.9     | 19.1    | 31.3    | 0.1      | 11.8     |
|                                 | DPFvsVLP           | *                                 | *        | 0.3      | 0.1     | 0.3     | 99.1     | 0.1      |
|                                 | PKWvsVLP           | 9.4                               | 5.9      | 15.2     | 34.7    | 25.3    | *        | 9.5      |
|                                 | Indirect estimates |                                   |          |          |         |         |          |          |
|                                 | BEFvsDPF           | 7.9                               | 5.0      | 30.1     | 1.4     | 9.2     | 42.8     | 3.5      |
|                                 |                    | 7.2                               | 4.5      | 11.6     | 11.9    | 19.3    | 38.2     | 7.3      |
|                                 |                    | 6.3                               | 3.9      | 10.1     | 23.2    | 16.8    | 33.3     | 6.4      |
| Entire network                  |                    | 10.0                              | 6.2      | 18.3     | 21.8    | 16.2    | 21.3     | 6.1      |
| Included studies                |                    | 3                                 | 1        | 3        | 2       | 7       | 1        | 4        |

The size of each square is proportional to the weight attached to each direct summary effect (horizontal axis) for the estimation of each network summary effects (vertical axis). The numbers re-express the weight as percentages.

**BEF:** Bridging external fixation; **CI:** Cast immobilization; **DPF:** Dorsal plate fixation; **IM:** Intramedullary nail; **PKW:** Percutaneous kirshner wire; **VLP:** Volar locking plate.
