# Supplementary material for: Effectiveness and Safety of Different Treatment Modalities for Patients Older Than 60 Years with Distal Radius Fracture: A Network Meta-Analysis of Clinical Trials
Source: MDPI journal article supplement (doi:10.3390/ijerph20043697), 2023-02-19

**Figure S4.** Funnel plot for grip strength (volar locking plate versus cast mobilization, ( $p=0.79$ ))

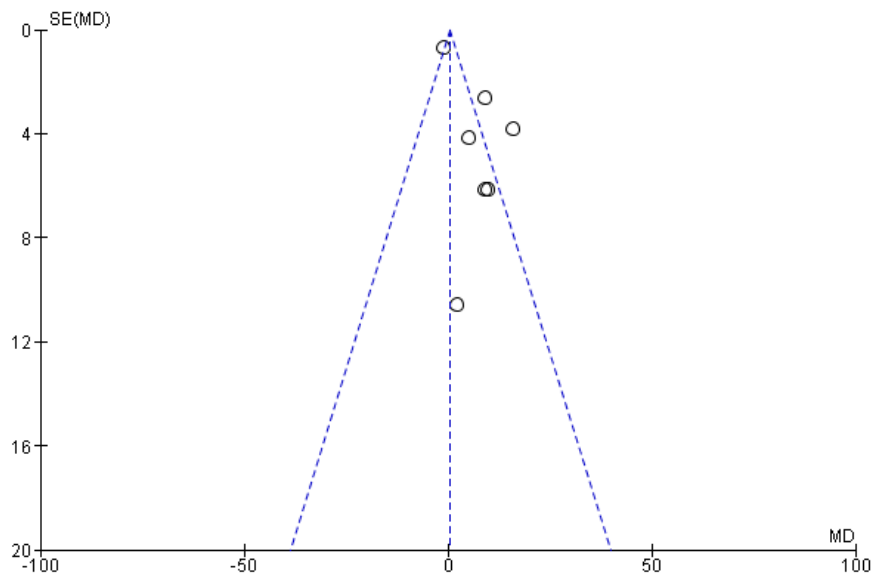

**Figure S5.** Funnel plot for DASH (volar locking plate versus k-wire fixation ( $p=0.82$ ))

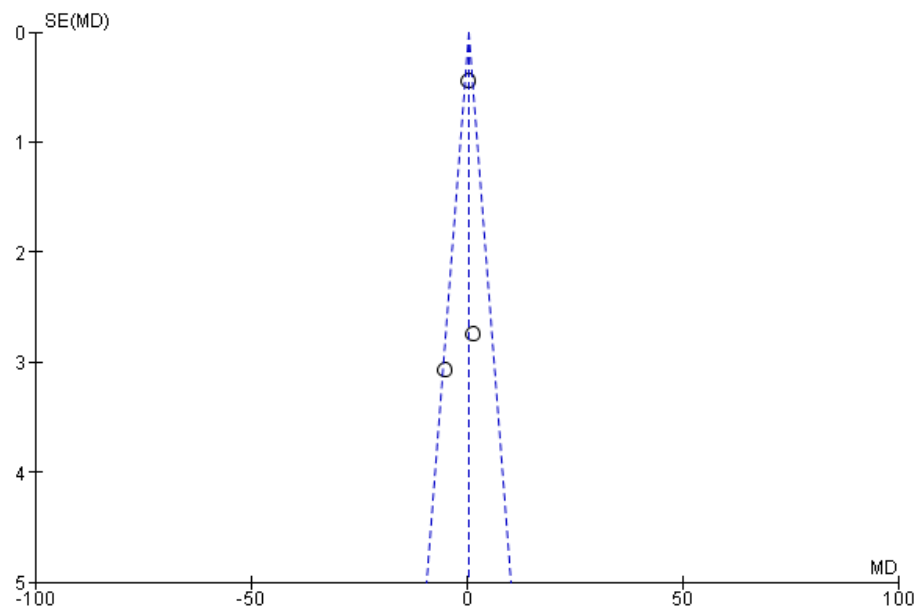

**Figure S6.** Funnel plot PRWE (volar locking plate versus bridging external fixation,  $p = 0.68$ )

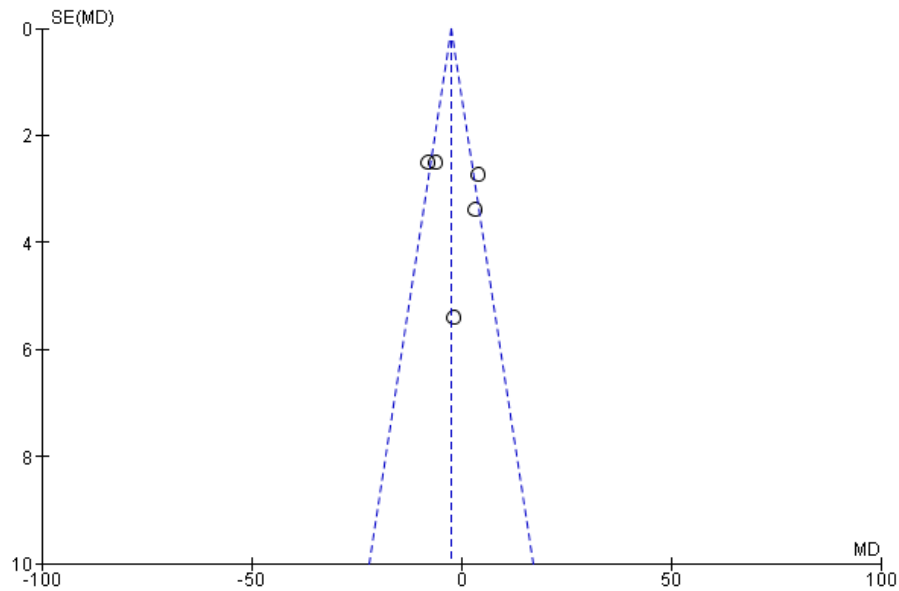

**Figure S7.** Funnel plot complications (percutaneous K-wire fixation versus cast immobilization,  $p = 0.85$ )

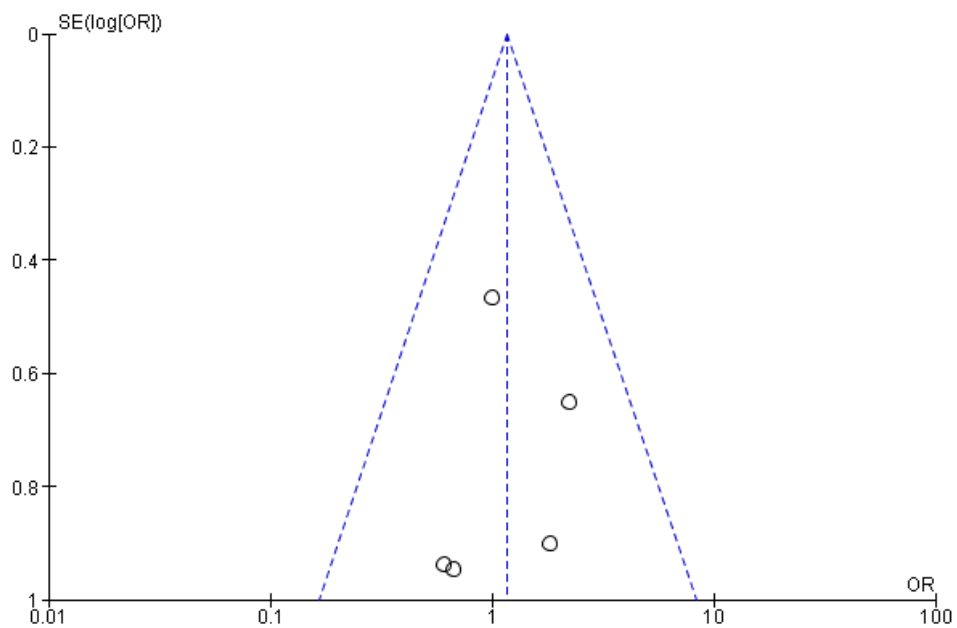

Supplement: s1 [file s1]
