# Supplementary material for: Effectiveness and Safety of Different Treatment Modalities for Patients Older Than 60 Years with Distal Radius Fracture: A Network Meta-Analysis of Clinical Trials
Source: MDPI journal article supplement (doi:10.3390/ijerph20043697), 2023-02-19
Supplement: s1 [file s1]

**Table S7.** Subgroup analyses of different treatment modalities on functional outcomes, by type of DRF.

| Comparisons | Type of DRF | Number studies | Grip Strength MD (95% CI) | I <sup>2</sup> (%) | p-value | Number studies | DASH MD (95% CI)         | I <sup>2</sup> (%) | p-value | Number studies | PRWE MD (95% CI)         | I <sup>2</sup> (%) | p-value |
|-------------|-------------|----------------|---------------------------|--------------------|---------|----------------|--------------------------|--------------------|---------|----------------|--------------------------|--------------------|---------|
| VLP / CI    | IA          | 1              | 9 (-2.9, 20.9)            | NA                 | 0.140   | 3              | -7.2 (-11.3, -2.9)       | 22.3               | 0.001   | 1              | -13 (-20.9, -5.1)        | NA                 | 0.001   |
| VLP / CI    | EA/IA       | 13             | <b>9.8 (6, 13.6)</b>      | 90                 | 0.000   | 10             | <b>-2.3 (-4.2, -0.4)</b> | 72                 | 0.016   | 10             | <b>-4.3 (-7.1, -1.5)</b> | 78.8               | 0.003   |
| VLP / PKW   | EA/IA       | 7              | <b>5.9 (1.3, 10.5)</b>    | 2.4                | 0.012   | 3              | -4.7 (-10.4, 0.9)        | 0                  | 0.103   | NA             | NA                       | NA                 | NA      |

EA: Extra-articular; IA: Intra-articular; CI: Confidence interval; MD: Mean difference; NA: Not available; DASH: Disabilities of the Arm, Shoulder and Hand questionnaire; PRWE: Patient-Rated Wrist Evaluation questionnaire. MD in **bold**: statistically significant.
