# Supplementary material for: Effectiveness and Safety of Different Treatment Modalities for Patients Older Than 60 Years with Distal Radius Fracture: A Network Meta-Analysis of Clinical Trials
Source: MDPI journal article supplement (doi:10.3390/ijerph20043697), 2023-02-19
Supplement: s1 [file s1]

**Table S3.** Excluded studies

| Study (First author/year) | Reference                                                                                                                                                                                                                                    | Reason for exclusion           |
|---------------------------|----------------------------------------------------------------------------------------------------------------------------------------------------------------------------------------------------------------------------------------------|--------------------------------|
| Abbaszadegan et al 1990   | External fixation or plaster cast for severely displaced Colles' fractures? Prospective 1-year study of 46 patients. <i>Acta Orthop Scand.</i> 1990 Dec;61(6):528-30.                                                                        | Patients < 60 years            |
| Abramo et al 2009         | Open reduction and internal fixation compared to closed reduction and external fixation in distal radial fractures: a randomized study of 50 patients. <i>Acta Orthop.</i> 2009 Aug;80(4):478-85.                                            | Patients < 60 years            |
| Aita et al 2014           | Randomized clinical trial on percutaneous minimally invasive osteosynthesis of fractures of the distal extremity of the radius. <i>Rev Bras Ortop.</i> 2014 Apr 18;49(3):218-26.                                                             | Patients < 60 years            |
| Aktekin et al 2010        | Comparison between external fixation and cast treatment in the management of distal radius fractures in patients aged 65 years and older. <i>J Hand Surg Am.</i> 2010 May;35(5):736-42.                                                      | Nonrandomized controlled trial |
| Andrade-Silva et al 2019  | Influence of postoperative immobilization on pain control of patients with distal radius fracture treated with volar locked plating: A prospective, randomized clinical trial. <i>Injury.</i> 2019 Feb;50(2):386-391.                        | Other comparison               |
| Andreasson et al 2020     | Functional outcome after corrective osteotomy for malunion of the distal radius: a randomised, controlled, double-blind trial. <i>Int Orthop.</i> 2020 Jul;44(7):1353-1365.                                                                  | Other comparison               |
| Arora et al 2009          | A comparative study of clinical and radiologic outcomes of unstable colles type distal radius fractures in patients older than 70 years: nonoperative treatment versus volar locking plating. <i>J Orthop Trauma.</i> 2009 Apr;23(4):237-42. | Nonrandomized controlled trial |
| Athar et al 2018          | Is external fixation a better way than plaster to supplement K-wires in non-comminuted distal radius fractures? <i>Postgrad Med J.</i> 2018 Jan;94(1107):20-24.                                                                              | Patients < 60 years            |
| Bahari-Kashani et al 2013 | Outcomes of pin and plaster versus locking plate in distal radius intraarticular fractures. <i>Trauma Mon.</i> 2013 Winter;17(4):380-5.                                                                                                      | Patients < 60 years            |
| Cassidy et al 2003        | Norian SRS cement compared with conventional fixation in distal radial fractures. A randomized study. <i>J Bone Joint Surg Am.</i> 2003 Nov;85(11):2127-37.                                                                                  | Patients < 60 years            |
| Chung et al 2008          | Comparative outcomes study using the volar locking plating system for distal radius fractures in both young adults and adults older than 60 years. <i>J Hand Surg Am.</i> 2008 Jul-Aug;33(6):809-19.                                         | Other comparison               |

|                     |                                                                                                                                                                                                                                            |                                |
|---------------------|--------------------------------------------------------------------------------------------------------------------------------------------------------------------------------------------------------------------------------------------|--------------------------------|
| Costa et al 2014    | Percutaneous fixation with Kirschner wires versus volar locking plate fixation in adults with dorsally displaced fracture of distal radius: randomised controlled trial. BMJ. 2014 Aug 5;349:g4807.                                        | Patients < 60 years            |
| Costa et al 2019    | Percutaneous fixation with Kirschner wires versus volar locking-plate fixation in adults with dorsally displaced fracture of distal radius: five-year follow-up of a randomized controlled trial. Bone Joint J. 2019 Aug;101-B(8):978-983. | Patients < 60 years            |
| Costa et al 2022    | Surgical fixation with K-wires versus casting in adults with fracture of distal radius: DRAFFT2 multicentre randomised clinical trial. BMJ. 2022 Jan 19;376:e068041.                                                                       | Patients < 60 years            |
| Drovetz et al 2016  | Volar locking distal radius plates show better short-term results than other treatment options: A prospective randomised controlled trial. World J Orthop. 2016 Oct 18;7(10):687-694.                                                      | Patients < 60 years            |
| Egol et al 2008     | Bridging external fixation and supplementary Kirschner-wire fixation versus volar locked plating for unstable fractures of the distal radius: a randomised, prospective trial. J Bone Joint Surg Br. 2008 Sep;90(9):1214-21.               | Patients < 60 years            |
| Egol et al 2010     | Distal radial fractures in the elderly: operative compared with nonoperative treatment. J Bone Joint Surg Am. 2010 Aug 4;92(9):1851-7.                                                                                                     | Nonrandomized controlled trial |
| Figl et al 2009     | Volar fixed-angle plate osteosynthesis of unstable distal radius fractures: 12 months results. Arch Orthop Trauma Surg. 2009 May;129(5):661-9.                                                                                             | Nonrandomized controlled trial |
| Figl 2010           | Unstable distal radius fractures in the elderly patient--volar fixed-angle plate osteosynthesis prevents secondary loss of reduction. J Trauma. 2010 Apr;68(4):992-8.                                                                      | Nonrandomized controlled trial |
| Földhazy et al 2007 | Long-term outcome of nonsurgically treated distal radius fractures. J Hand Surg Am. 2007 Nov;32(9):1374-84.                                                                                                                                | Patients < 60 years            |
| Franck et al 2000   | Distal radius fracture--is non-bridging articular external fixator a therapeutic alternative? A prospective randomized study. Unfallchirurg. 2000 Oct;103(10):826-33.                                                                      | Patients < 60 years            |
| Gradl et al 2013    | Non-bridging external fixation employing multiplanar K-wires versus volar locked plating for dorsally displaced fractures of the distal radius. Arch Orthop Trauma Surg. 2013 May;133(5):595-602.                                          | Patients < 60 years            |
| Gradl et al 2014    | Intramedullary nail versus volar plate fixation of extra-articular distal radius fractures. Two-year results of a prospective randomized trial. Injury. 2014 Jan;45 Suppl 1:S3-8.                                                          | Patients < 60 years            |
| Gradl et al 2016    | Fixation of intra-articular fractures of the distal radius using intramedullary nailing: a randomized trial versus palmar locking plates. Injury. 2016 Dec;47 Suppl 7:S25-S30.                                                             | Patients < 60 years            |

|                      |                                                                                                                                                                                                                                                                       |                                |
|----------------------|-----------------------------------------------------------------------------------------------------------------------------------------------------------------------------------------------------------------------------------------------------------------------|--------------------------------|
| Grewal et al 2005    | A randomized prospective study on the treatment of intra-articular distal radius fractures: open reduction and internal fixation with dorsal plating versus mini open reduction, percutaneous fixation, and external fixation. J Hand Surg Am. 2005 Jul;30(4):764-72. | Patients < 60 years            |
| Grewal et al 2011    | Open reduction internal fixation versus percutaneous pinning with external fixation of distal radius fractures: a prospective, randomized clinical trial. J Hand Surg Am. 2011 Dec;36(12):1899-906.                                                                   | Patients < 60 years            |
| Gruber et al 2008    | Volar plate fixation of AO type C2 and C3 distal radius fractures, a single-center study of 55 patients. J Orthop Trauma. 2008 Aug;22(7):467-72.                                                                                                                      | Nonrandomized controlled trial |
| Günay et al 2015     | Which modality is the best choice in distal radius fractures treated with two different Kirschner wire fixation and immobilization techniques? Ulus Travma Acil Cerrahi Derg. 2015 Mar;21(2):119-26.                                                                  | Patients < 60 years            |
| Hammer et al 2019    | Volar Locking Plates Versus Augmented External Fixation of Intra-Articular Distal Radial Fractures: Functional Results from a Randomized Controlled Trial. J Bone Joint Surg Am. 2019 Feb 20;101(4):311-321.                                                          | Patients < 60 years            |
| Harley et al 2004    | Augmented external fixation versus percutaneous pinning and casting for unstable fractures of the distal radius--a prospective randomized trial. J Hand Surg Am. 2004 Sep;29(5):815-24.                                                                               | Patients < 60 years            |
| Hayes et al 2008     | Bridging and non-bridging external fixation in the treatment of unstable fractures of the distal radius: a retrospective study of 588 patients. Acta Orthop. 2008 Aug;79(4):540-7.                                                                                    | Nonrandomized controlled trial |
| Howard et al 1989    | External fixation or plaster for severely displaced comminuted Colles' fractures? A prospective study of anatomical and functional results. J Bone Joint Surg Br. 1989 Jan;71(1):68-73.                                                                               | Patients < 60 years            |
| Kapoor et al 2000    | Displaced intra-articular fractures of distal radius: a comparative evaluation of results following closed reduction, external fixation and open reduction with internal fixation. Injury. 2000 Mar;31(2):75-9.                                                       | Patients < 60 years            |
| Karantana et al 2013 | Surgical treatment of distal radial fractures with a volar locking plate versus conventional percutaneous methods: a randomized controlled trial. J Bone Joint Surg Am. 2013 Oct 2;95(19):1737-44.                                                                    | Patients < 60 years            |
| Kim et al 2021       | The Effect of Providing Audiovisual Surgical Information on Decisional Conflict in Patients Undergoing Plate Fixation for Distal Radius Fractures. Clin Orthop Surg. 2021 Mar;13(1):18-23.                                                                            | Other comparison               |

|                     |                                                                                                                                                                                                                                     |                                |
|---------------------|-------------------------------------------------------------------------------------------------------------------------------------------------------------------------------------------------------------------------------------|--------------------------------|
| Kreder et al 2005   | Indirect reduction and percutaneous fixation versus open reduction and internal fixation for displaced intra-articular fractures of the distal radius: a randomised, controlled trial. J Bone Joint Surg Br. 2005 Jun;87(6):829-36. | Patients < 60 years            |
| Krishnan et al 2003 | Intra-articular fractures of the distal radius: a prospective randomised controlled trial comparing static bridging and dynamic non-bridging external fixation. J Hand Surg Br. 2003 Oct;28(5):417-21.                              | Patients < 60 years            |
| Krukhaug et al 2009 | External fixation of fractures of the distal radius: a randomized comparison of the Hoffman compact II non-bridging fixator and the Dynawrist fixator in 75 patients followed for 1 year. Acta Orthop. 2009 Feb;80(1):104-8.        | Patients < 60 years            |
| Landgren et al 2011 | External or internal fixation in the treatment of non-reducible distal radial fractures? Acta Orthop. 2011 Oct;82(5):610-3.                                                                                                         | Patients < 60 years            |
| Lattmann et al 2008 | Comparison of 2 surgical approaches for volar locking plate osteosynthesis of the distal radius. J Hand Surg Am. 2008 Sep;33(7):1135-43.                                                                                            | Other comparison               |
| Löw et al 2020      | The Requirement for Closed Reduction of Dorsally Displaced Unstable Distal Radius Fractures Before Operative Treatment. Dtsch Arztebl Int. 2020 Nov 13;117(46):783-789.                                                             | Other comparison               |
| Lutz et al 2014     | Complications associated with operative versus nonsurgical treatment of distal radius fractures in patients aged 65 years and older. J Hand Surg Am. 2014 Jul;39(7):1280-6.                                                         | Nonrandomized controlled trial |
| Ma et al 2016       | External fixation is more suitable for intra-articular fractures of the distal radius fracture in elderly patients. Bone Res. 2014; 4: 16017.                                                                                       | Nonrandomized controlled trial |
| Manrique et al 2017 | Percutaneous pinning vs. internal fixation with locking plate: Postoperative results of comminuted fractures of the distal radius metaphysis. A randomised controlled trial. Rev Colomb Ortop Traumatol. 2017; 31(3): 114-9.        | Patients < 60 years            |
| Mardani et al 2011  | Distal Radius Fracture, a Comparison Between Closed Reduction and Long Arm Cast Vs. Closed Reduction and Percutaneous Pinning and Short Arm Cast. Shiraz E-Medical Journal. 2011; 12(3): 151-61.                                    | Patients < 60 years            |
| McFayden 2011       | Should unstable extra-articular distal radial fractures be treated with fixed-angle volar-locked plates or percutaneous Kirschner wires? A prospective randomised controlled trial. Injury. 2011 Feb;42(2):162-6.                   | Patients < 60 years            |
| McQueen et al 1996  | Redisplaced unstable fractures of the distal radius: a prospective randomised comparison of four methods of treatment. J Bone Joint Surg Br. 1996 May;78(3):404-9.                                                                  | Patients < 60 years            |
| McQueen et al 1998  | Redisplaced unstable fractures of the distal radius. A randomised, prospective study of bridging versus non-bridging external fixation. J Bone Joint Surg Br. 1998 Jul;80(4):665-9.                                                 | Patients < 60 years            |

|                              |                                                                                                                                                                                                                                         |                                |
|------------------------------|-----------------------------------------------------------------------------------------------------------------------------------------------------------------------------------------------------------------------------------------|--------------------------------|
| Mirhamidi et al 2013         | A prospective comparison between Kapandji and percutaneous extra-focal fixation in extra articular distal radius fractures. Int J Clin Exp Med. 2013;6(2):133-9.                                                                        | Patients < 60 years            |
| Mishra et al 2021            | A comparative study of variable angle volar plate and bridging external fixator with K-wire augmentation in comminuted distal radius fractures. Chin J Traumatol. 2021 Sep;24(5):301-305.                                               | Patients < 60 years            |
| Mulders et al 2019           | Volar Plate Fixation Versus Plaster Immobilization in Acceptably Reduced Extra-Articular Distal Radial Fractures: A Multicenter Randomized Controlled Trial. J Bone Joint Surg Am. 2019 May 1;101(9):787-796.                           | Patients < 60 years            |
| Nishiwaki et al 2021         | A Prospective Randomized Comparison of Variable-Angle and Fixed-Angle Volar Locking Plating for Intra-Articular Distal Radius Fractures. J Hand Surg Am. 2021 Jul;46(7):584-593.                                                        | Patients < 60 years            |
| Oshige et al 2007            | A comparative study of clinical and radiological outcomes of dorsally angulated unstable distal radius fractures in elderly patients: intrafocal pinning versus volar locking plating. J Hand Surg Am. 2007 Nov;32(9):1385-92.          | Nonrandomized controlled trial |
| Plate et al 2015             | Randomized comparison of volar locking plates and intramedullary nails for unstable distal radius fractures. J Hand Surg Am. 2015 Jun;40(6):1095-101.                                                                                   | Patients < 60 years            |
| Pritchett 1995               | External fixation or closed medullary pinning for unstable Colles fractures? J Bone Joint Surg Br. 1995 Mar;77(2):267-9.                                                                                                                | Patients < 60 years            |
| Rahman et al 2012            | Treatment of unstable intraarticular fracture of distal radius: POP casting with external fixation. J Pak Med Assoc. 2012 Apr;62(4):358-62.                                                                                             | Patients < 60 years            |
| Roh et al 2015               | A randomized comparison of volar plate and external fixation for intra-articular distal radius fractures. J Hand Surg Am. 2015 Jan;40(1):34-41.                                                                                         | Patients < 60 years            |
| Roumen et al 1991            | Unstable Colles' fractures in elderly patients. A randomised trial of external fixation for redisplacement. J Bone Joint Surg Br. 1991 Mar;73(2):307-11.                                                                                | Patients < 60 years            |
| Rozental et al 2009          | Functional outcomes for unstable distal radial fractures treated with open reduction and internal fixation or closed reduction and percutaneous fixation. A prospective randomized trial. J Bone Joint Surg Am. 2009 Aug;91(8):1837-46. | Patients < 60 years            |
| Safi et al 2013              | Treatment of extra-articular and simple articular distal radial fractures with intramedullary nail versus volar locking plate. J Hand Surg Eur Vol. 2013 Sep;38(7):774-9.                                                               | Patients < 60 years            |
| Schmelzer-Schmied et al 2009 | Comparison of external fixation, locking and non-locking palmar plating for unstable distal                                                                                                                                             | Nonrandomized controlled trial |

|                        |                                                                                                                                                                                                                                                                  |                     |
|------------------------|------------------------------------------------------------------------------------------------------------------------------------------------------------------------------------------------------------------------------------------------------------------|---------------------|
|                        | radius fractures in the elderly. <i>Int Orthop.</i> 2009 Jun;33(3):773-8.                                                                                                                                                                                        |                     |
| Schønnemann et al 2011 | Randomised study of non-bridging external fixation compared with intramedullary fixation of unstable distal radial fractures. <i>J Plast Surg Hand Surg.</i> 2011 Sep;45(4-5):232-7.                                                                             | Patients < 60 years |
| Sharma et al 2014      | Outcomes and complications of fractures of distal radius (AO type B and C): volar plating versus nonoperative treatment. <i>J Orthop Sci.</i> 2014 Jul;19(4):537-44.                                                                                             | Patients < 60 years |
| Sharma et al 2020      | Prospective Randomized Study Comparing the External Fixator and Volar Locking Plate in Intraarticular Distal Radius Fractures: Which Is Better? <i>Cureus.</i> 2020 Feb 2;12(2):e6849.                                                                           | Patients < 60 years |
| Shukla et al 2014      | External fixation versus volar locking plate for displaced intra-articular distal radius fractures: a prospective randomized comparative study of the functional outcomes. <i>J Orthop Traumatol.</i> 2014 Dec;15(4):265-70.                                     | Patients < 60 years |
| Sirniö et al 2019      | Early palmar plate fixation of distal radius fractures may benefit patients aged 50 years or older: a randomized trial comparing 2 different treatment protocols. <i>Acta Orthop.</i> 2019 Apr;90(2):123-128.                                                    | Patients < 60 years |
| Subramanian et al 2015 | "A Comparative Study between "Closed Reduction and Cast Immobilisation "And" Closed Reduction, Percutaneous K-Wire Fixation, Cast Immobilisation" In Distal Radius Fractures". <i>Journal of Evolution of Medical and Dental Sciences</i> 2015; 67(4): 11714-23. | Patients < 60 years |
| Toon et al 2017        | Outcomes and financial implications of intra-articular distal radius fractures: a comparative study of open reduction internal fixation (ORIF) with volar locking plates versus nonoperative management. <i>J Orthop Traumatol.</i> 2017 Sep;18(3):229-234.      | Patients < 60 years |
| Uchikura et al 2004    | Comparative study of nonbridging and bridging external fixators for unstable distal radius fractures. <i>J Orthop Sci.</i> 2004;9(6):560-5.                                                                                                                      | Patients < 60 years |
| Venkatesh et al 2016   | Comparative Study between Closed Reduction and Cast Application Versus Percutaneous K-Wire Fixation for Extra-Articular Fracture Distal end of Radius. <i>J Clin Diagn Res.</i> 2016 Feb;10(2):RC05-9.                                                           | Patients < 60 years |
| Wei et al 2009         | Unstable distal radial fractures treated with external fixation, a radial column plate, or a volar plate. A prospective randomized trial. <i>J Bone Joint Surg Am.</i> 2009 Jul;91(7):1568-77.                                                                   | Patients < 60 years |
| Wilke et al 2011       | Wrist function recovers more rapidly after volar locked plating than after external fixation but the outcomes are similar after 1 year. <i>Acta Orthop.</i> 2011 Feb;82(1):76-81.                                                                                | Patients < 60 years |
| Williksen et al 2013   | Volar locking plates versus external fixation and adjuvant pin fixation in unstable distal radius                                                                                                                                                                | Patients < 60 years |

|                      |                                                                                                                                                                                                              |                     |
|----------------------|--------------------------------------------------------------------------------------------------------------------------------------------------------------------------------------------------------------|---------------------|
|                      | fractures: a randomized, controlled study. J Hand Surg Am. 2013 Aug;38(8):1469-76.                                                                                                                           |                     |
| Williksen et al 2015 | External Fixation and Adjuvant Pins Versus Volar Locking Plate Fixation in Unstable Distal Radius Fractures: A Randomized, Controlled Study With a 5-Year Follow-Up. J Hand Surg Am. 2015 Jul;40(7):1333-40. | Patients < 60 years |
| Xu et al 2009        | Prospective randomised study of intra-articular fractures of the distal radius: comparison between external fixation and plate fixation. Ann Acad Med Singap. 2009 Jul;38(7):600-6.                          | Patients < 60 years |
| Young et al 2003     | Seven-year outcome following Colles' type distal radial fracture. A comparison of two treatment methods. J Hand Surg Br. 2003 Oct;28(5):422-6.                                                               | Patients < 60 years |
| Zehir et al 2014     | Intramedullary repair device against volar plating in the reconstruction of extra-articular and simple articular distal radius fractures; a randomized pilot study. Int Orthop. 2014 Aug;38(8):1655-60.      | Patients < 60 years |
