# Supplementary material for: Effectiveness and Safety of Different Treatment Modalities for Patients Older Than 60 Years with Distal Radius Fracture: A Network Meta-Analysis of Clinical Trials
Source: MDPI journal article supplement (doi:10.3390/ijerph20043697), 2023-02-19
Supplement: s1 [file s1]

**Table S5.** Subgroup analyses of different treatment modalities on functional outcomes, by time of follow-up.

| Comparisons     | Follow-up (months) | Number studies | Grip Strength MD (95% CI) | I <sup>2</sup> (%) | p-value | Number studies | DASH MD (95% CI)         | I <sup>2</sup> (%) | p-value | Number studies | PRWE MD (95% CI)          | I <sup>2</sup> (%) | p-value |
|-----------------|--------------------|----------------|---------------------------|--------------------|---------|----------------|--------------------------|--------------------|---------|----------------|---------------------------|--------------------|---------|
| <b>VLP / CI</b> | 3                  | 6              | <b>13.9 (4.2, 23.5)</b>   | 94.3               | 0.005   | 5              | <b>-5.7 (-8.2, -3.1)</b> | 0                  | 0.000   | 5              | <b>-9.2 (-18.1, -0.3)</b> | 87.2               | 0.044   |
| <b>VLP / CI</b> | 12                 | 6              | <b>7.1 (1.1, 13.1)</b>    | 84.3               | 0.019   | 7              | -0.6 (-2.1, 0.9)         | 57.6               | 0.467   | 5              | -2.7 (-5.8, 0.5)          | 38                 | 0.094   |
| <b>VLP / CI</b> | 24                 | 2              | 6.7 (-1.3, 15.1)          | 0                  | 0.1     | 1              | <b>-12 (-19.1, -4.9)</b> | NA                 | 0.001   | 1              | <b>-13 (-20.9, -5.1)</b>  | NA                 | 0.001   |

|           |    |   |                        |   |       |    |                   |    |       |    |    |    |    |
|-----------|----|---|------------------------|---|-------|----|-------------------|----|-------|----|----|----|----|
| VLP / PKW | 3  | 4 | <b>9.9 (3.9, 15.8)</b> | 0 | 0.001 | 3  | -4.7 (-10.4, 0.9) | 0  | 0.103 | NA | NA | NA | NA |
| VLP / PKW | 12 | 3 | -12 (-33.9, 9.9)       | 0 | 0.858 | NA | NA                | NA | NA    | NA | NA | NA | NA |

CI: Confidence interval; MD: Mean difference; NA: Not available; DASH: Disabilities of the Arm, Shoulder and Hand questionnaire; PRWE: Patient-Rated Wrist Evaluation questionnaire. MD **in bold**: statistically significant.
